# Supplementary material
Source: PubMed Central journal article supplement (PMC7116658)

**Figure 2d - Histone methyltransferase assays**

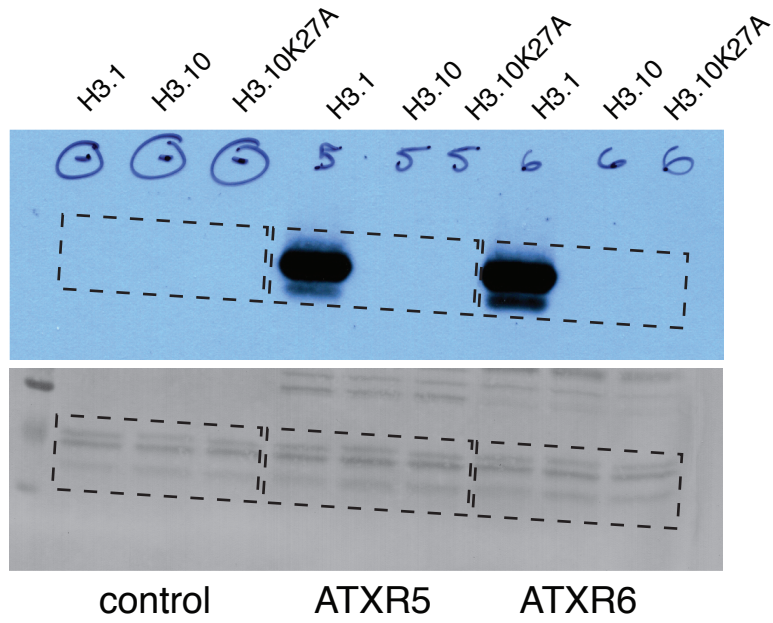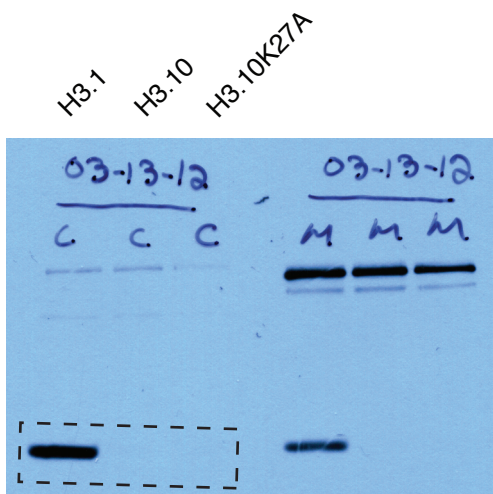

CLF-PRC2

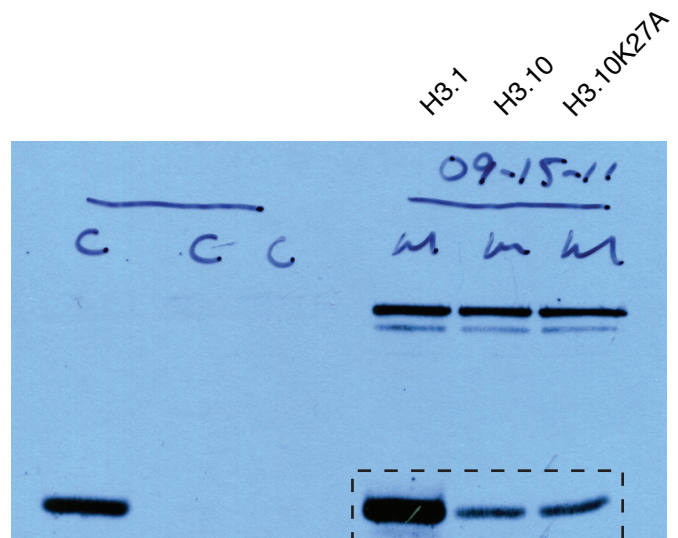

MEA-PRC2

**Figure 2e - Western blots with ProHTR5:HTR10-HA lines**

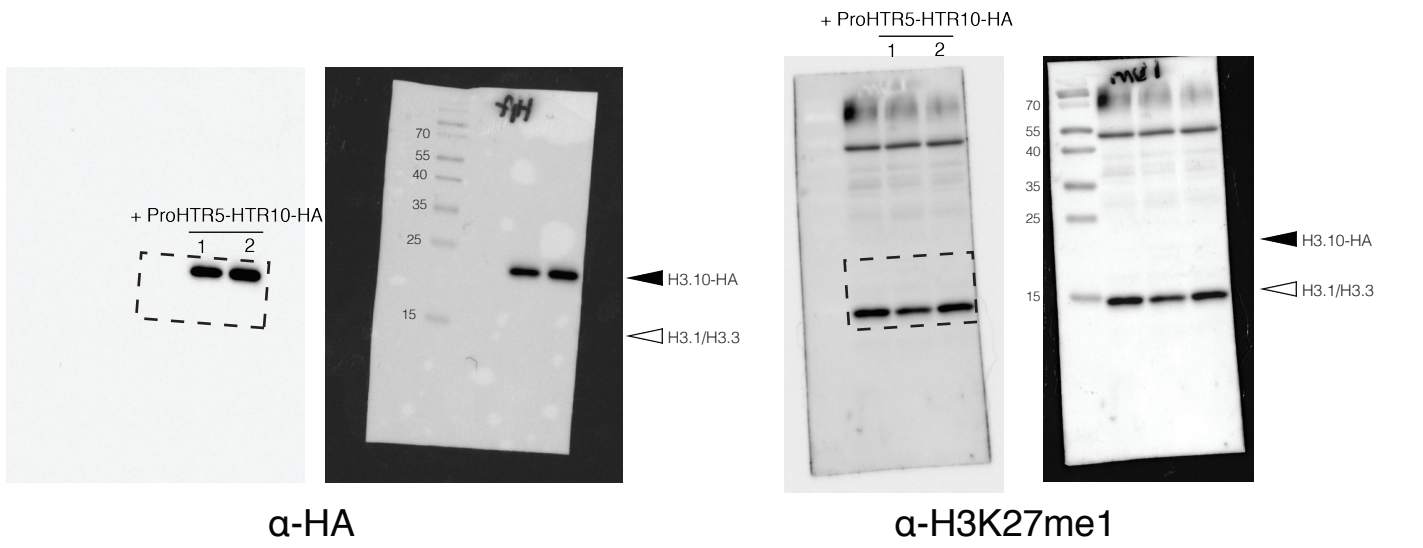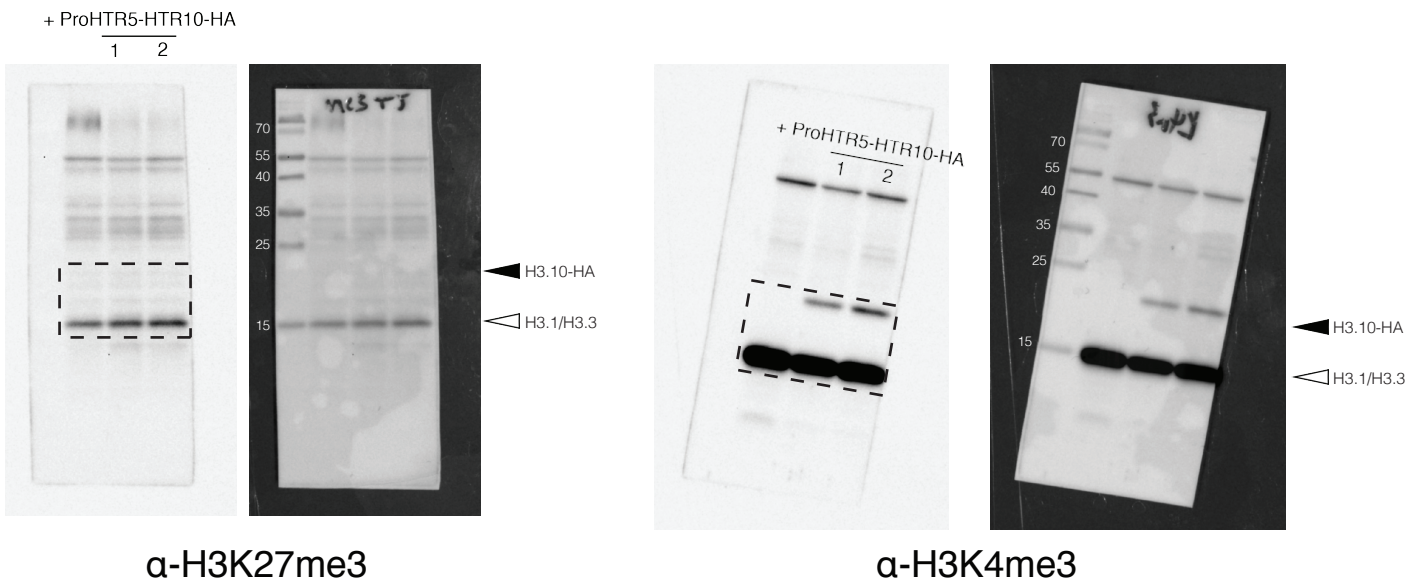

Supplement: EMS111977-supplement-EMS111977_Source_Dat_Fig_2.pdf [file EMS111977-supplement-EMS111977_Source_Dat_Fig_2.pdf]
