# Supplementary material
Source: PubMed Central journal article supplement (PMC7116658)

## Extended Data Figure 2b,c - Dot blot assays

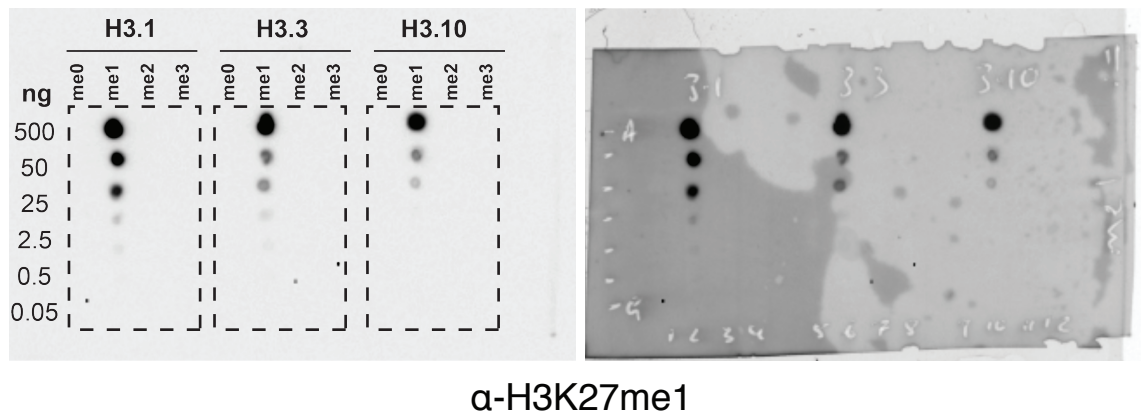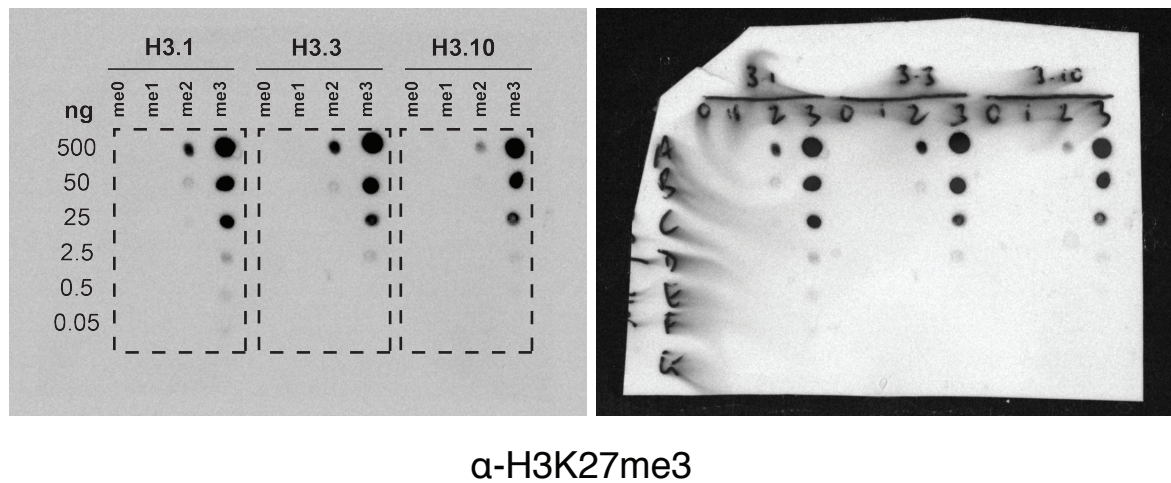

Supplement: EMS111977-supplement-EMS111977_Source_Dat_Ext_Dat_Fig_2.pdf [file EMS111977-supplement-EMS111977_Source_Dat_Ext_Dat_Fig_2.pdf]
